# Supplementary material
Source: Springer Nature journal article supplement (https://www.springermedizin.de/resource/supplementary/12891_2009_726_MOESM2_ESM.pdf/9506270)

**A**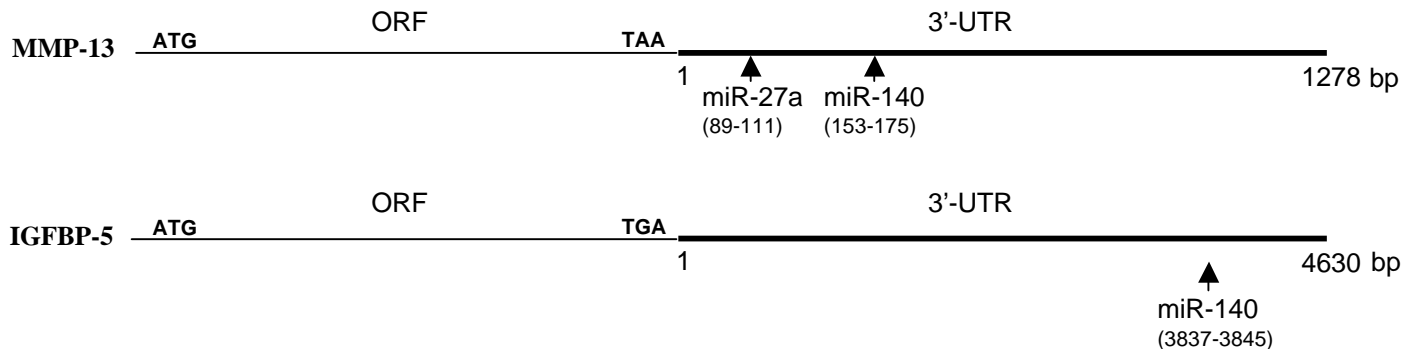**B**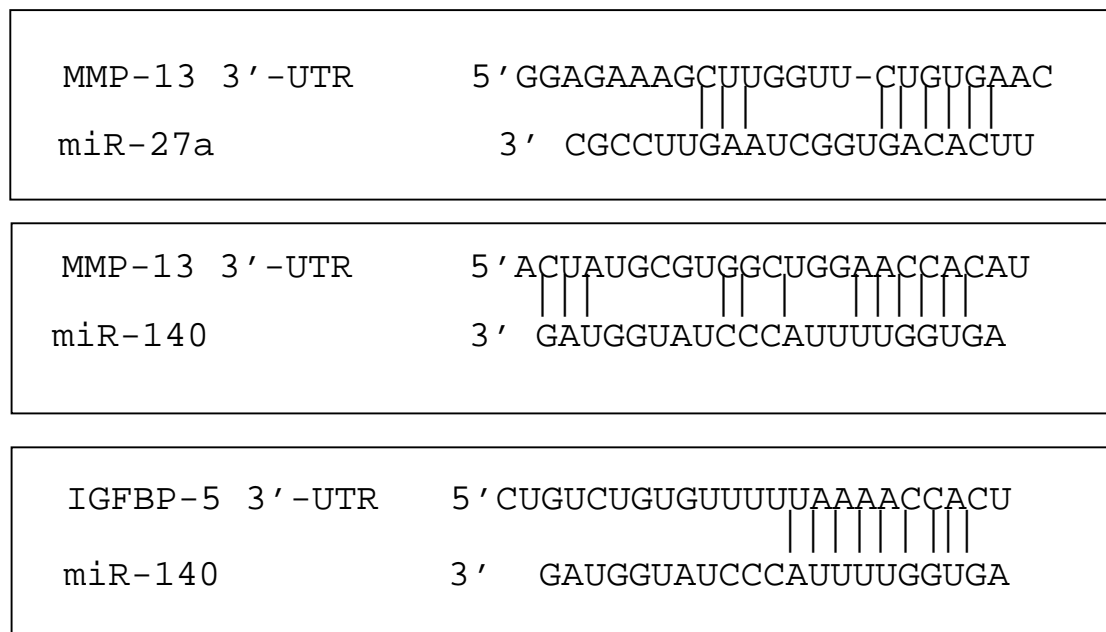

Supplement: MOESM2 [file 9506270]
